# Supplementary material for: 3D ultralong nanowire arrays with a tailored hydrogen titanate phase as binder-free anodes for Li-ion capacitors
Source: Royal Society of Chemistry journal article supplement (doi:10.1039/c6ta02413k), 2016-01-01
Supplement: c6ta02413k1.pdf [file c6ta02413k1.pdf]

**Supporting information for**  
**3D Ultralong Nanowire Arrays with Tailored Hydrogen Titanate Phase as**  
**Binder-Free Anodes for Li-Ion Capacitors**

Lanfang Que, Zhenbo Wang,\* Fuda Yu and Daming Gu

School of Chemical Engineering and Technology, Harbin Institute of Technology, No.92

West-Da Zhi Street, Harbin, 150001 China

\*Corresponding author. Tel.: +86-451-86417853; Fax: +86-451-86418616;

E-mail: wangzhib@hit.edu.cn

Contents:

**Figure S1.** FESEM images of sodium titanate nanowires with different treated time (a) 2h, (b) 6h and (c) 12h, respectively.

**Figure S2.** CV curves of AC cathode in various scan rates.

**Figure S3.** Cross-sectional FESEM images of (a) AC cathode and (b) HTO NWAs anode.

**Figure S4.** Volumetric energy density vs. volumetric power density, only for electrodes.

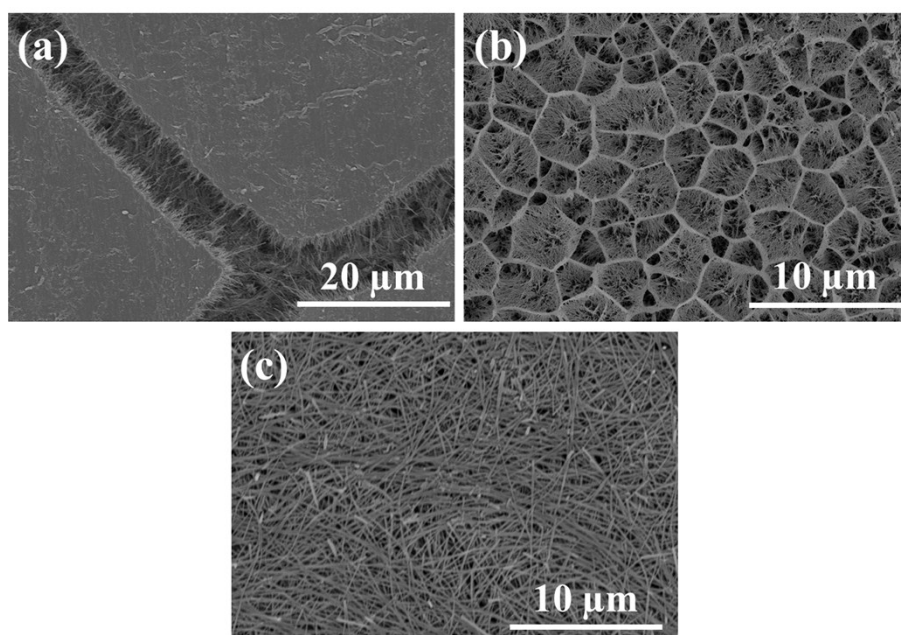

Fig. S1 FESEM images of sodium titanate nanowires with different treated time (a) 2h, (b) 6h and (c) 12h, respectively.

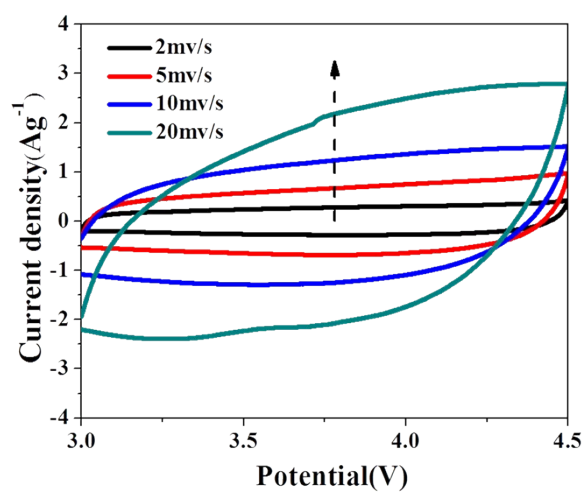

Fig. S2 CV curves of AC cathode in various scan rates.

The volumetric energy density is based on the thickness and mass loading following the equation:  $\rho = m / S d$ , where  $m$  is the mass of electrode materials (g),  $S$  and  $d$  are the area ( $\text{cm}^2$ ) and thickness (cm) of the effective electrode materials, respectively. As shown in Fig. S3, the thicknesses of the cathode and anode are  $37.5\mu\text{m}$  and  $7.1\mu\text{m}$ , respectively. The packing density of the cathode and anode was calculated as  $\sim 0.69$  and  $0.92\text{ g}\cdot\text{cm}^{-3}$ , respectively. Thus, the volumetric energy densities (only for the electrodes) are demonstrated in Fig S4.

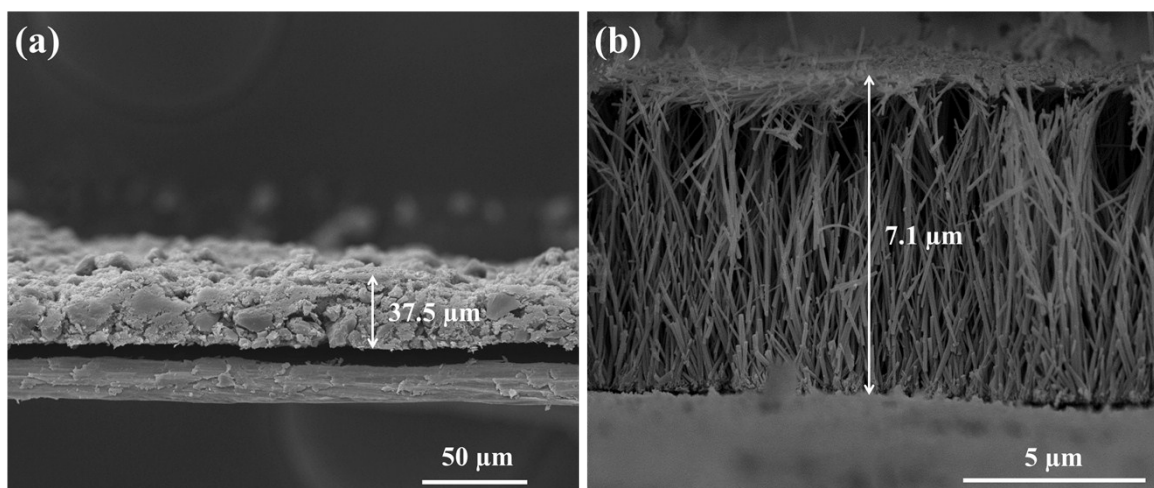

Fig. S3 Cross-sectional FESEM images of (a) AC cathode and (b) HTO NWAs anode

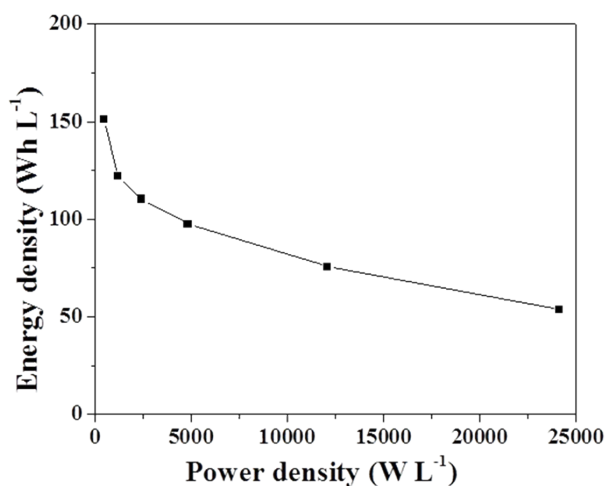

Fig. S4 Volumetric energy density vs. volumetric power density, only for electrodes.
